# Supplementary material for: Polar winter climate change: strong local effects from sea ice loss, widespread consequences from warming seas
Source: Copernicus journal article supplement (doi:10.5194/acp-25-8127-2025), 2025-07-30
Supplement: Supplementary file 1 [file acp-25-8127-2025-supplement.pdf]

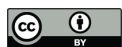

*Supplement of*

## **Polar winter climate change: strong local effects from sea ice loss, widespread consequences from warming seas**

**Tuomas Naakka et al.**

*Correspondence to:* Annica M. L. Ekman ([annica.ekman@misu.su.se](mailto:annica.ekman@misu.su.se))

The copyright of individual parts of the supplement might differ from the article licence.

# Supplementary material

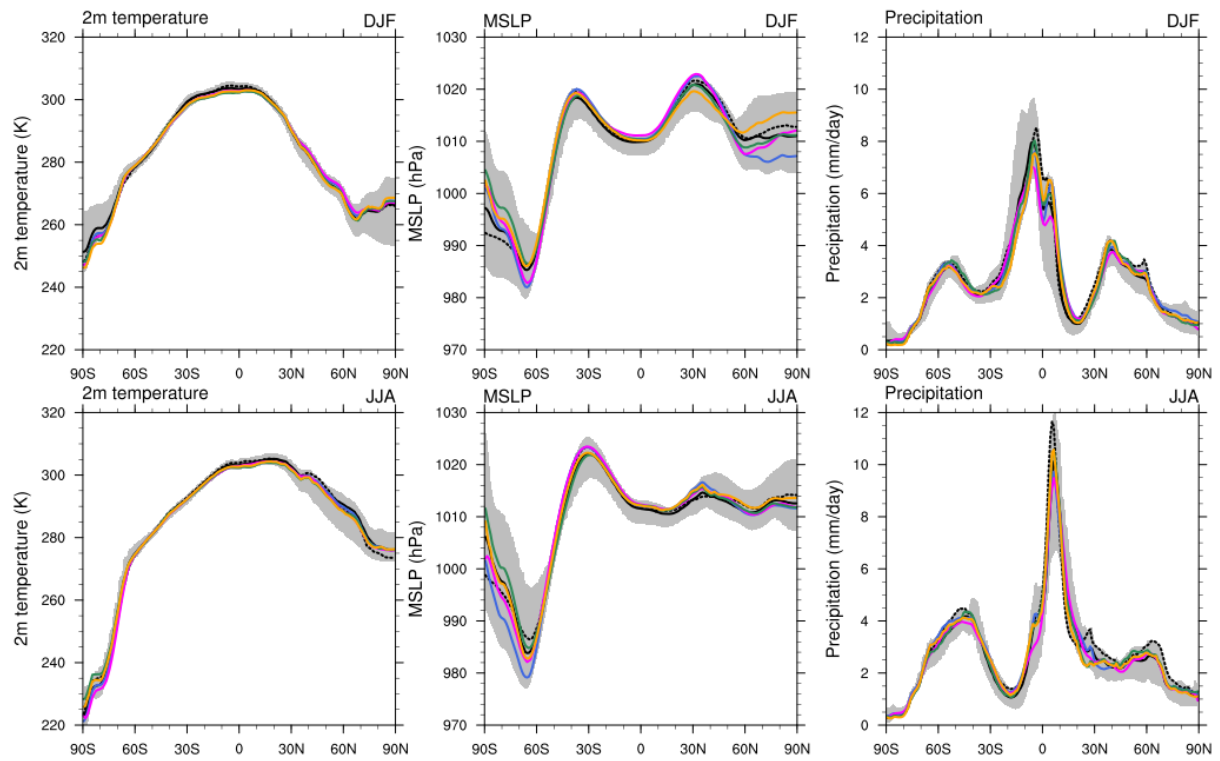

Figure S1. Seasonal means of zonal mean of 2m temperature (left), mean sea level pressure (middle), and precipitation (right), in the SSP585 simulations and in the CMIP6 scenario SSP5 8.5 simulations (years 2080 - 2099). The blue (CESM2), magenta (NorESM2), green (EC-Earth3) and yellow (OpenIFS) lines show the models applied in the present study and the black line shows the CMIP6 multi-model mean and black dashed line shows ACCESS-ESM1.5 CMIP6 simulation where sea ice cover and SST were taken. The gray area shows the range between the minimum and maximum of the 23 CMIP6 models. The upper row shows mean values for northern hemisphere winter (DJF) and the lower row shows mean values for southern hemisphere winter (JJA).

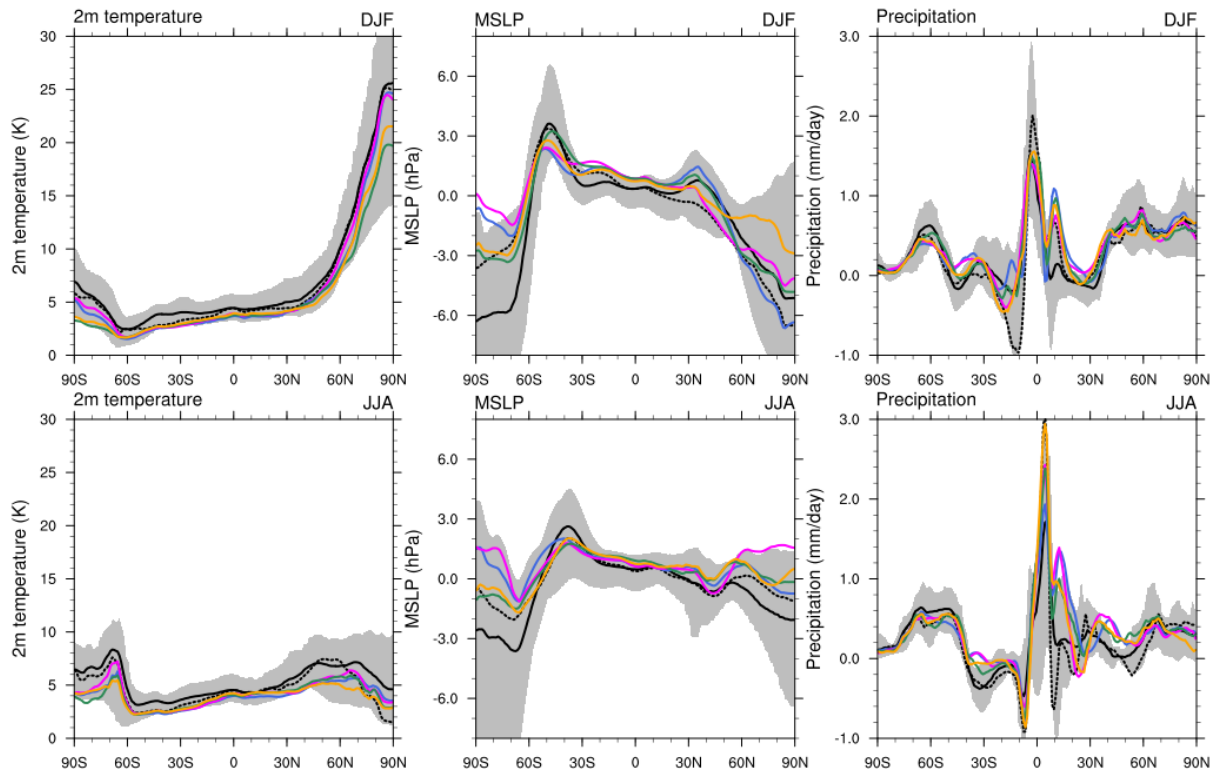

*Figure S2. Seasonal mean differences of zonal mean of 2m temperature (left), mean sea level pressure (middle), and precipitation (right), between the SSP585 and baseline simulations and in the CMIP6 scenario SSP5 8.5 and historical simulations (2080 - 2099). The blue (CESM2), magenta (NorESM2), green (EC-Earth3) and yellow (OpenIFS) lines show the models applied in the present study and the black line shows the CMIP6 multi-model mean and black dashed line shows ACCESS-ESM1.5 CMIP6 simulation where sea ice cover and SST were taken. The gray area shows the range between the minimum and maximum of the 23 CMIP6 models. The upper row shows mean values for northern hemisphere winter (DJF) and the lower row shows mean values for southern hemisphere winter (JJA).*



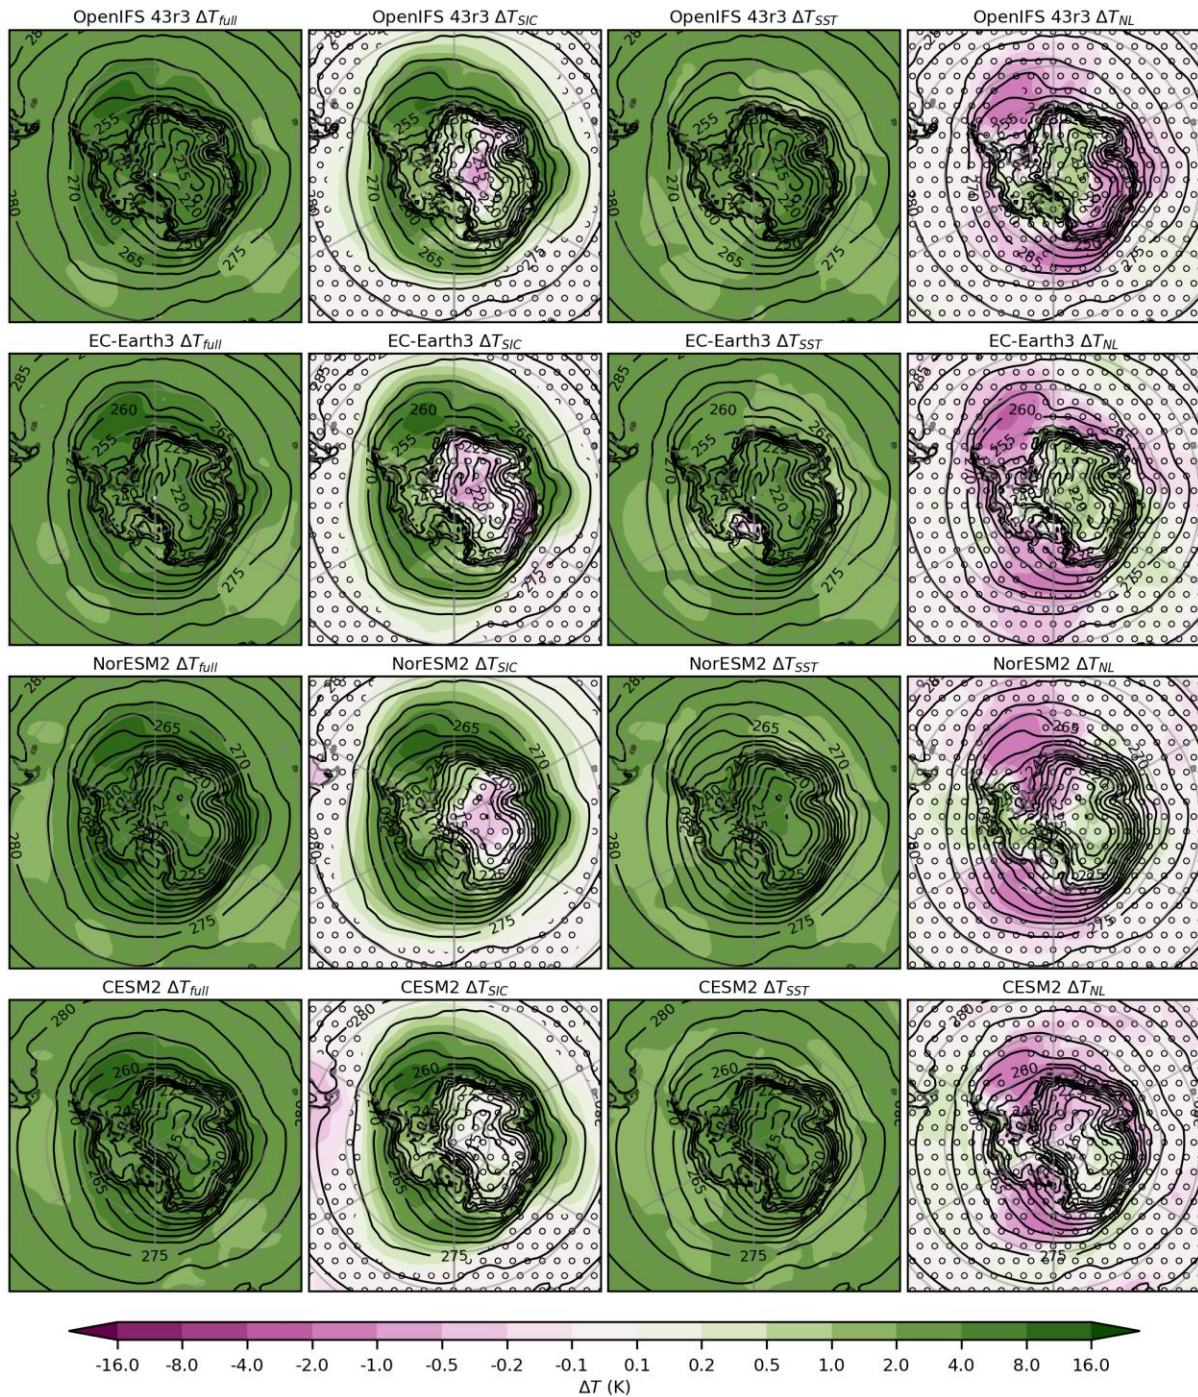

Figure S3. Difference in 2m temperature ( $T$ ) in southern hemisphere winter (JJA) between the SSP585 simulation and Baseline ( $\Delta T_{full}$ , left), between SIC\_SSP585 and Baseline ( $\Delta T_{SIC}$ , 2nd left), between SST\_SSP585 and Baseline ( $\Delta T_{SST}$ , 3rd left) and the nonlinear ( $\Delta T_{NL}$  residual) contribution (right). The model in the 1st row is OpenIFS, 2nd row is EC-Earth3, 3rd row is NorESM2 and 4th row is CESM2. Stippling indicates that the changes are not statistically significant based on t-test with  $p$ -value 0.05 and contours show the 2m temperature in Baseline simulation.



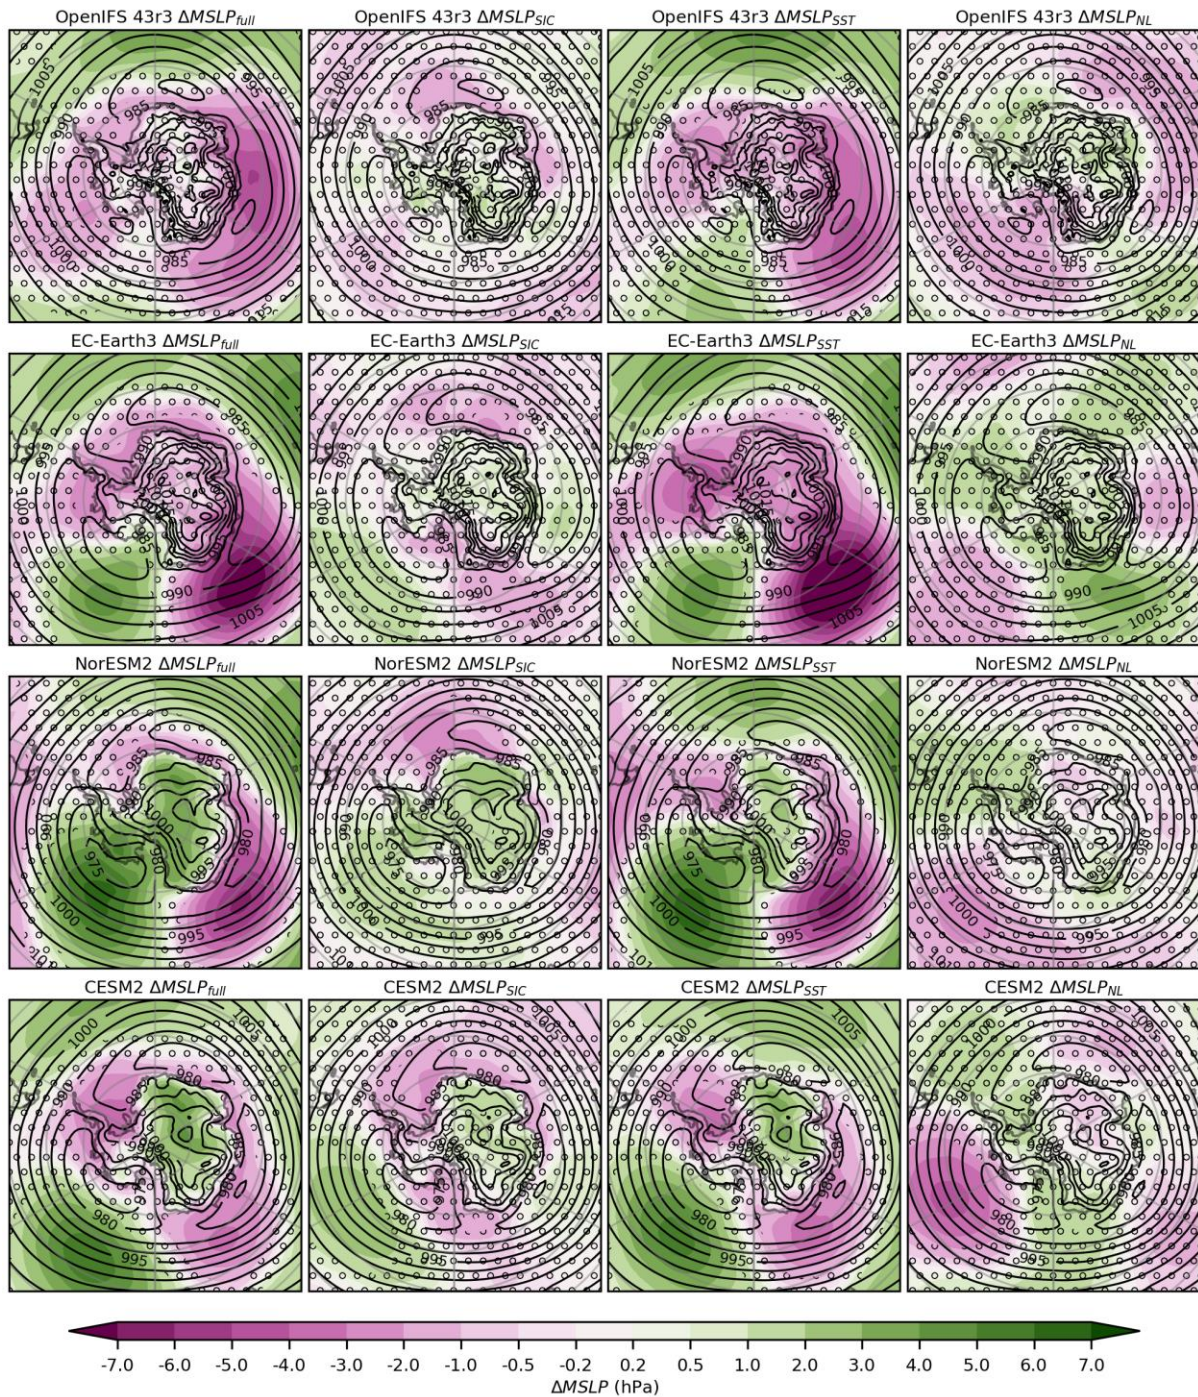

Figure S4. Difference in mean sea level pressure (MSLP) in southern hemisphere winter (JJA) between the SSP585 simulation and Baseline ( $\Delta T_{full}$ , left), between SIC\_SSP585 and Baseline ( $\Delta T_{SIC}$ , 2nd left), between SST\_SSP585 and Baseline ( $\Delta T_{SST}$ , 3rd left) and the nonlinear ( $\Delta T_{NL}$  residual) contribution (right). The model in the 1st row is OpenIFS, 2nd row is EC-Earth3, 3rd row is NorESM2 and 4th row is CESM2. Stippling indicates that the changes are not statistically significant based on  $t$ -test with  $p$ -value 0.05 and contours show the MSLP in Baseline simulation.



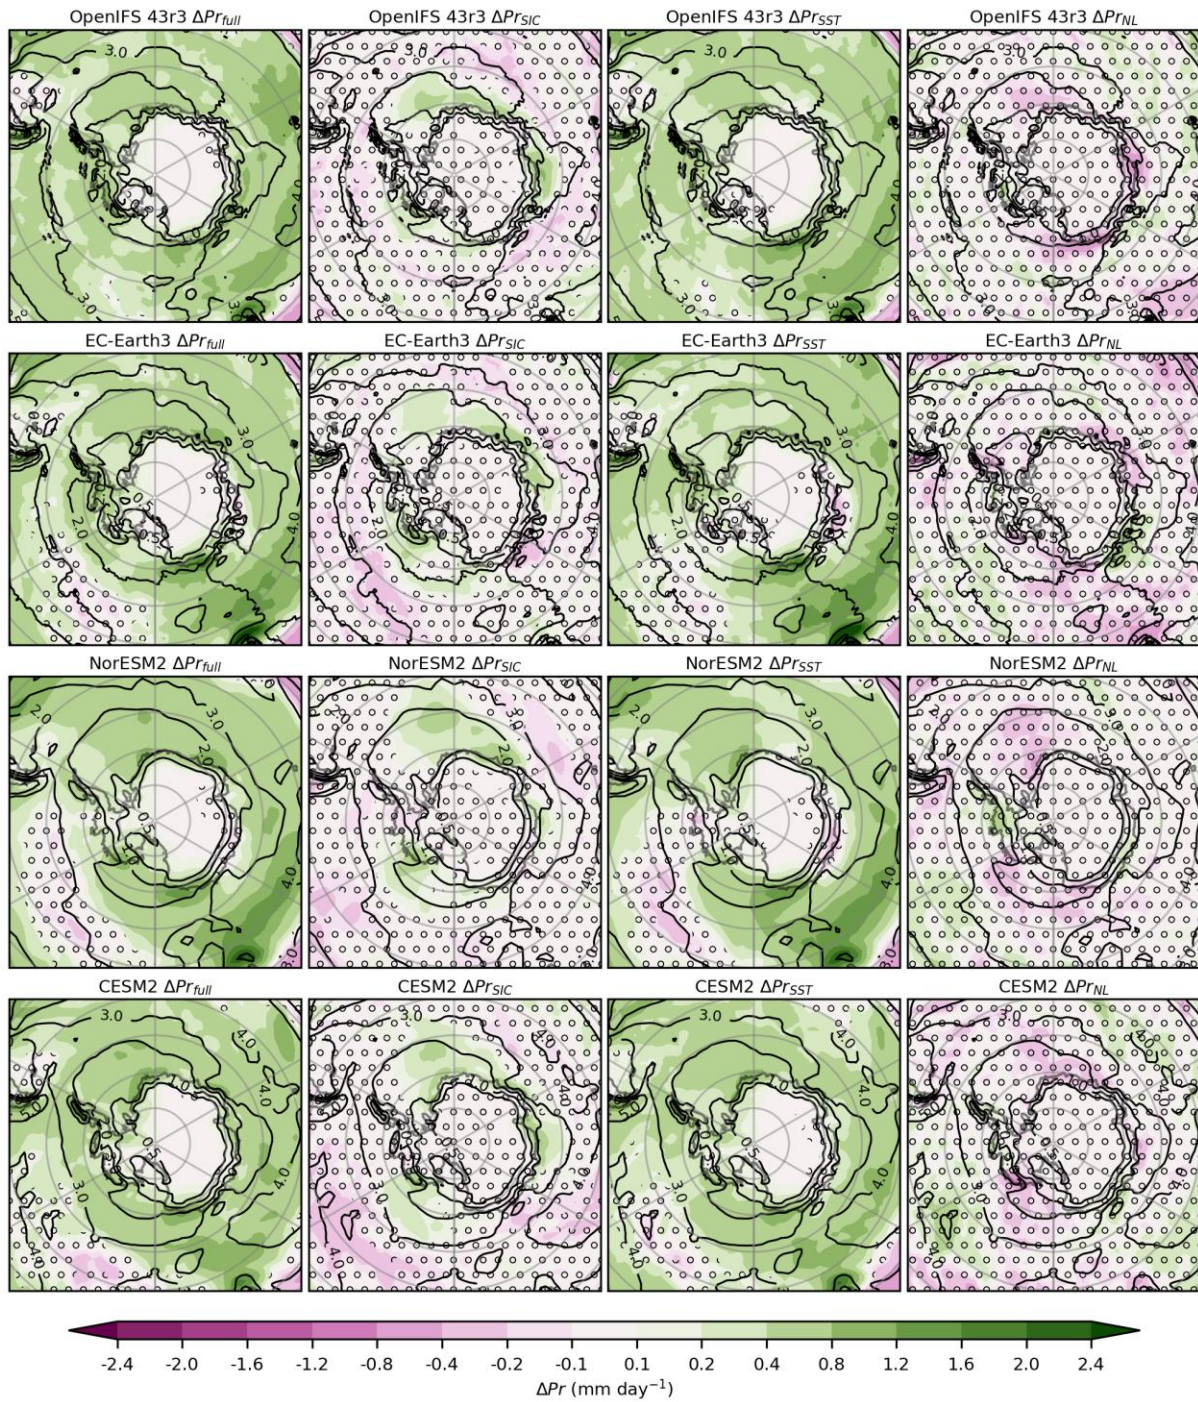

Figure S5. Difference in precipitation ( $Pr$ ) in southern hemisphere winter (JJA) between the SSP585 simulation and Baseline ( $\Delta T_{full}$ , left), between SIC\_SSP585 and Baseline ( $\Delta T_{SIC}$ , 2nd left), between SST\_SSP585 and Baseline ( $\Delta T_{SST}$ , 3rd left) and the nonlinear ( $\Delta T_{NL}$ , residual) contribution (right). The model in the 1st row is OpenIFS, 2nd row is EC-Earth3, 3rd row is NorESM2 and 4th row is CESM2. Stippling indicates that the changes are not statistically significant based on  $t$ -test with  $p$ -value 0.05 and contours show the precipitation in Baseline simulation.

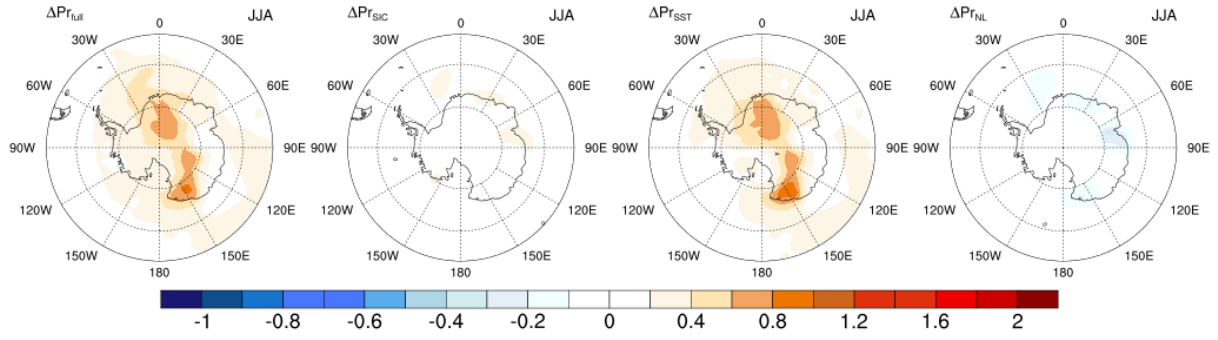

Figure S6. Multi-model mean relative difference in precipitation ( $Pr$ ) in northern hemisphere winter (JJA) between the SSP585 simulation and Baseline ( $\Delta T_{full}$ , left), between SIC\_SSP585 and Baseline ( $\Delta T_{SIC}$ , 2nd left), between SST\_SSP585 and Baseline ( $\Delta T_{SST}$ , 3rd left) and the nonlinear ( $\Delta T_{NL}$  residual) contribution (right).



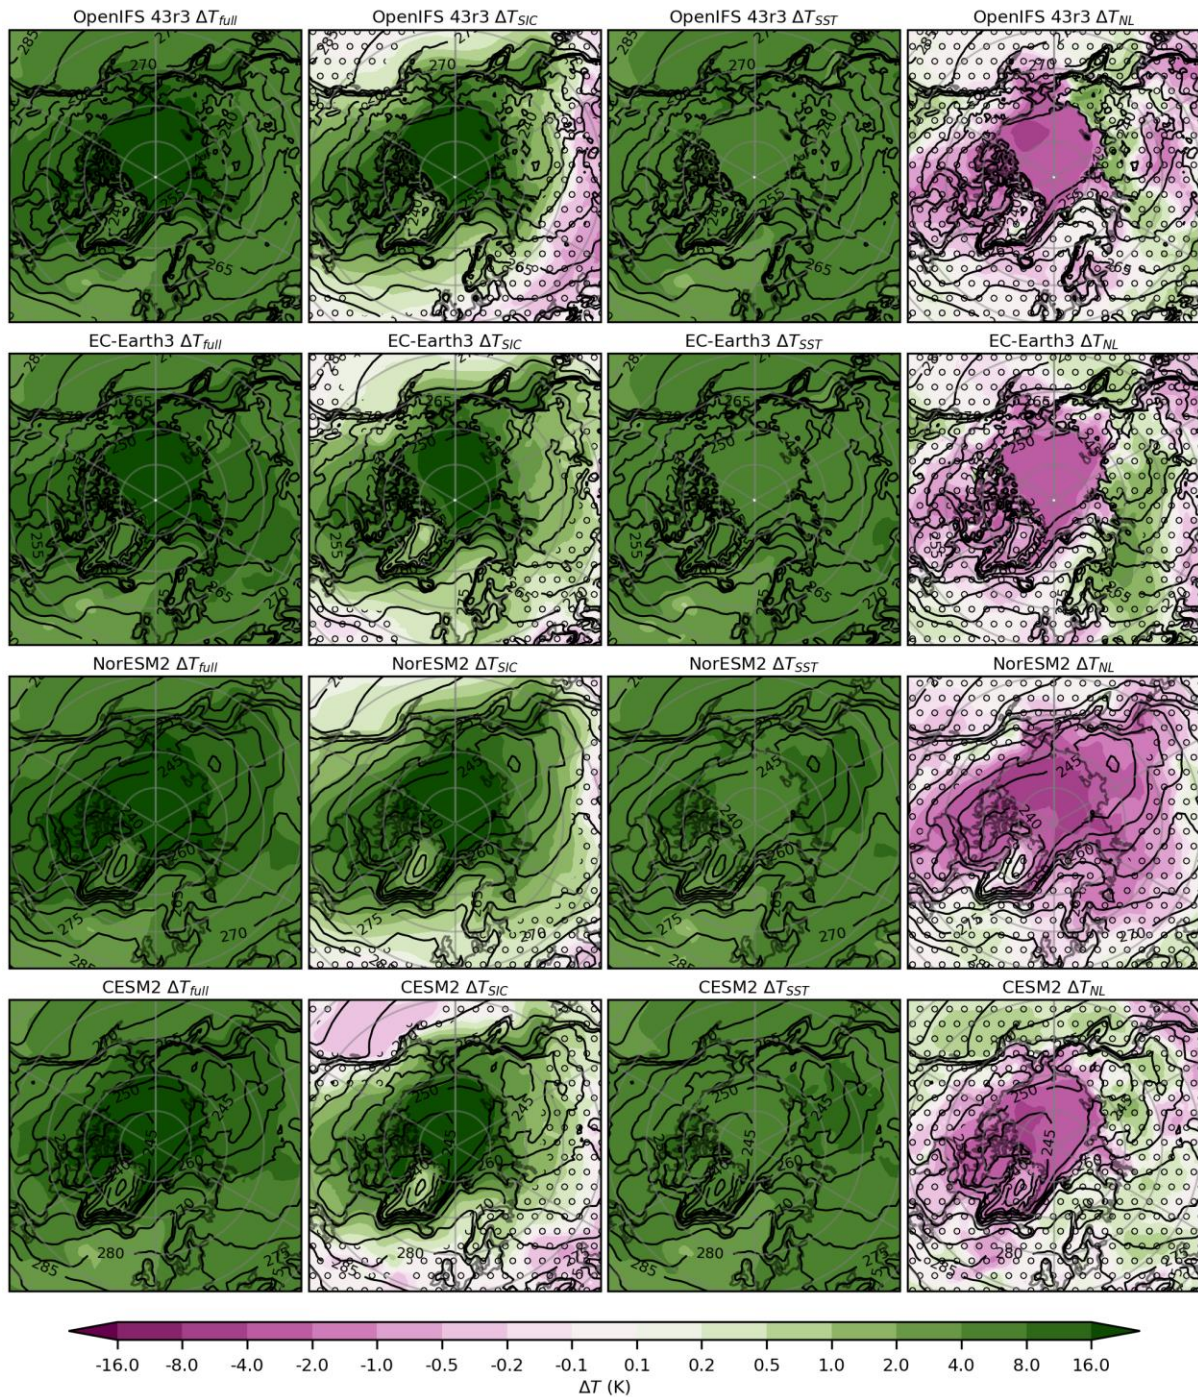

Figure S7. Difference in 2m temperature ( $T$ ) in northern hemisphere winter (DJF) between the SSP585 simulation and Baseline ( $\Delta T_{full}$ , left), between SIC\_SSP585 and Baseline ( $\Delta T_{SIC}$ , 2nd left), between SST\_SSP585 and Baseline ( $\Delta T_{SST}$ , 3rd left) and the nonlinear ( $\Delta T_{NL}$  residual) contribution (right). The model in the 1st row is OpenIFS, 2nd row is EC-Earth3, 3rd row is NorESM2 and 4th row is CESM2. Stippling indicates that the changes are not statistically significant based on t-test with  $p$ -value 0.05 and contours show the 2m temperature in Baseline simulation.



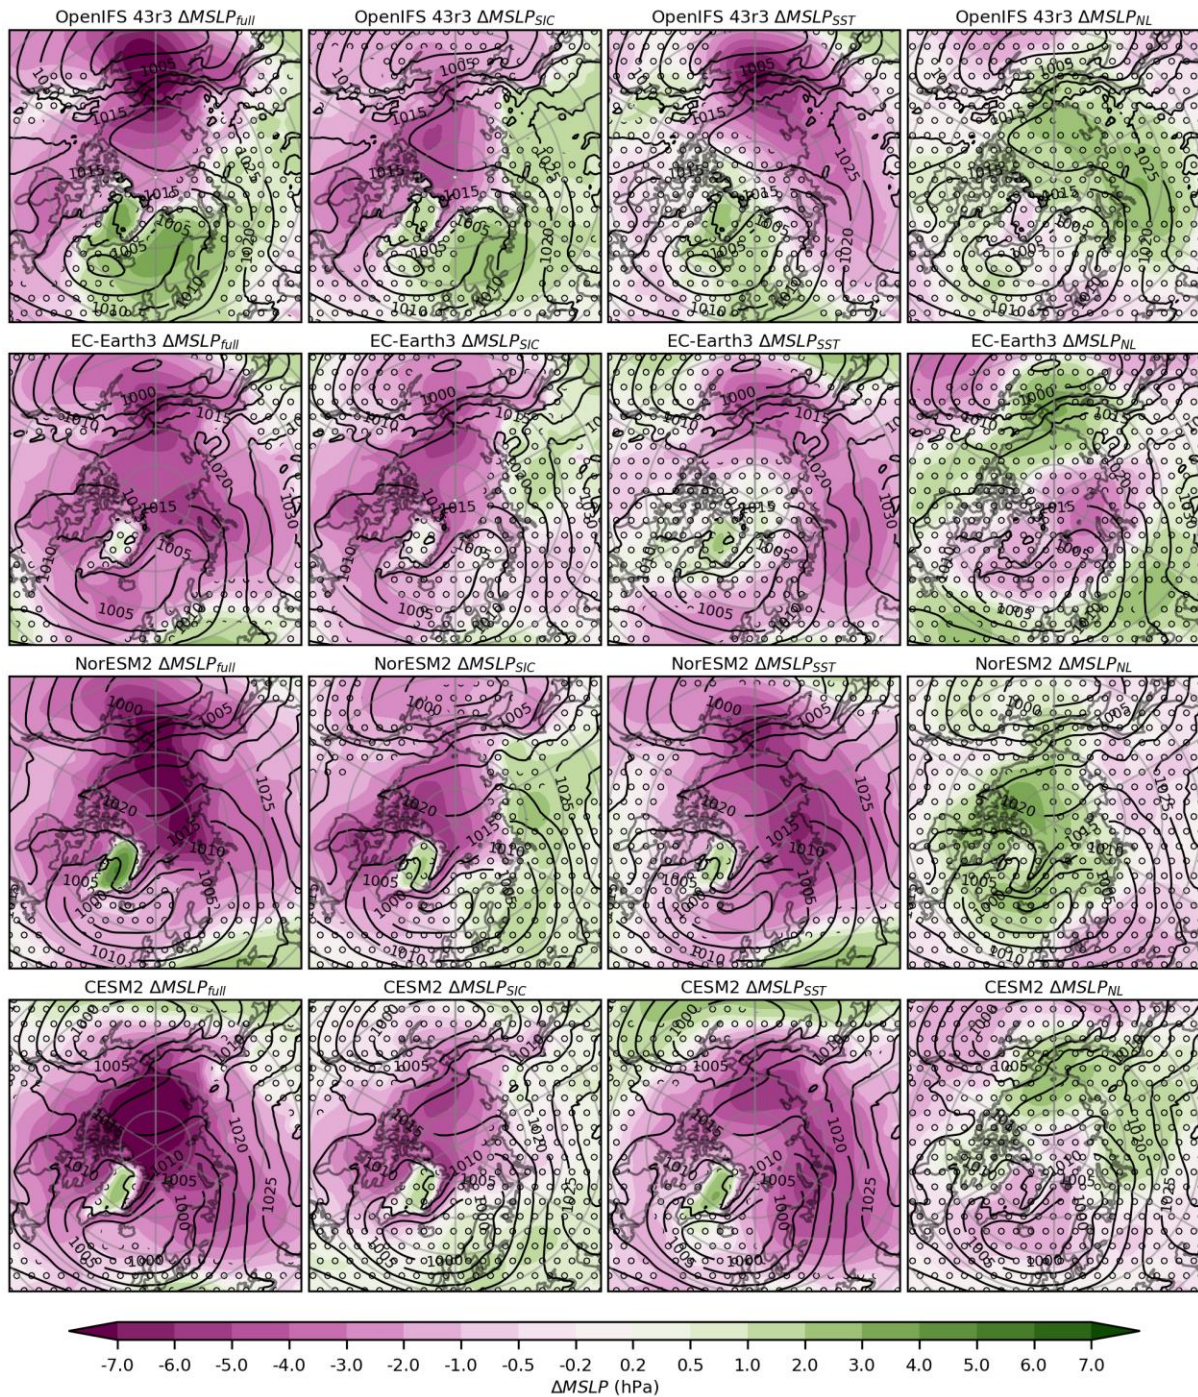

Figure S8. Difference in mean sea level pressure (MSLP) in northern hemisphere winter (DJF) between the SSP585 simulation and Baseline ( $\Delta\text{MSLP}_{\text{full}}$ , left), between SIC\_SSP585 and Baseline ( $\Delta\text{MSLP}_{\text{SIC}}$ , 2nd left), between SST\_SSP585 and Baseline ( $\Delta\text{MSLP}_{\text{SST}}$ , 3rd left) and the nonlinear ( $\Delta\text{MSLP}_{\text{NL}}$  residual) contribution (right). The model in the 1st row is OpenIFS, 2nd row is EC-Earth3, 3rd row is NorESM2 and 4th row is CESM2. Stippling indicates that the changes are not statistically significant based on t-test with p-value 0.05 and contours show the MSLP in Baseline simulation.



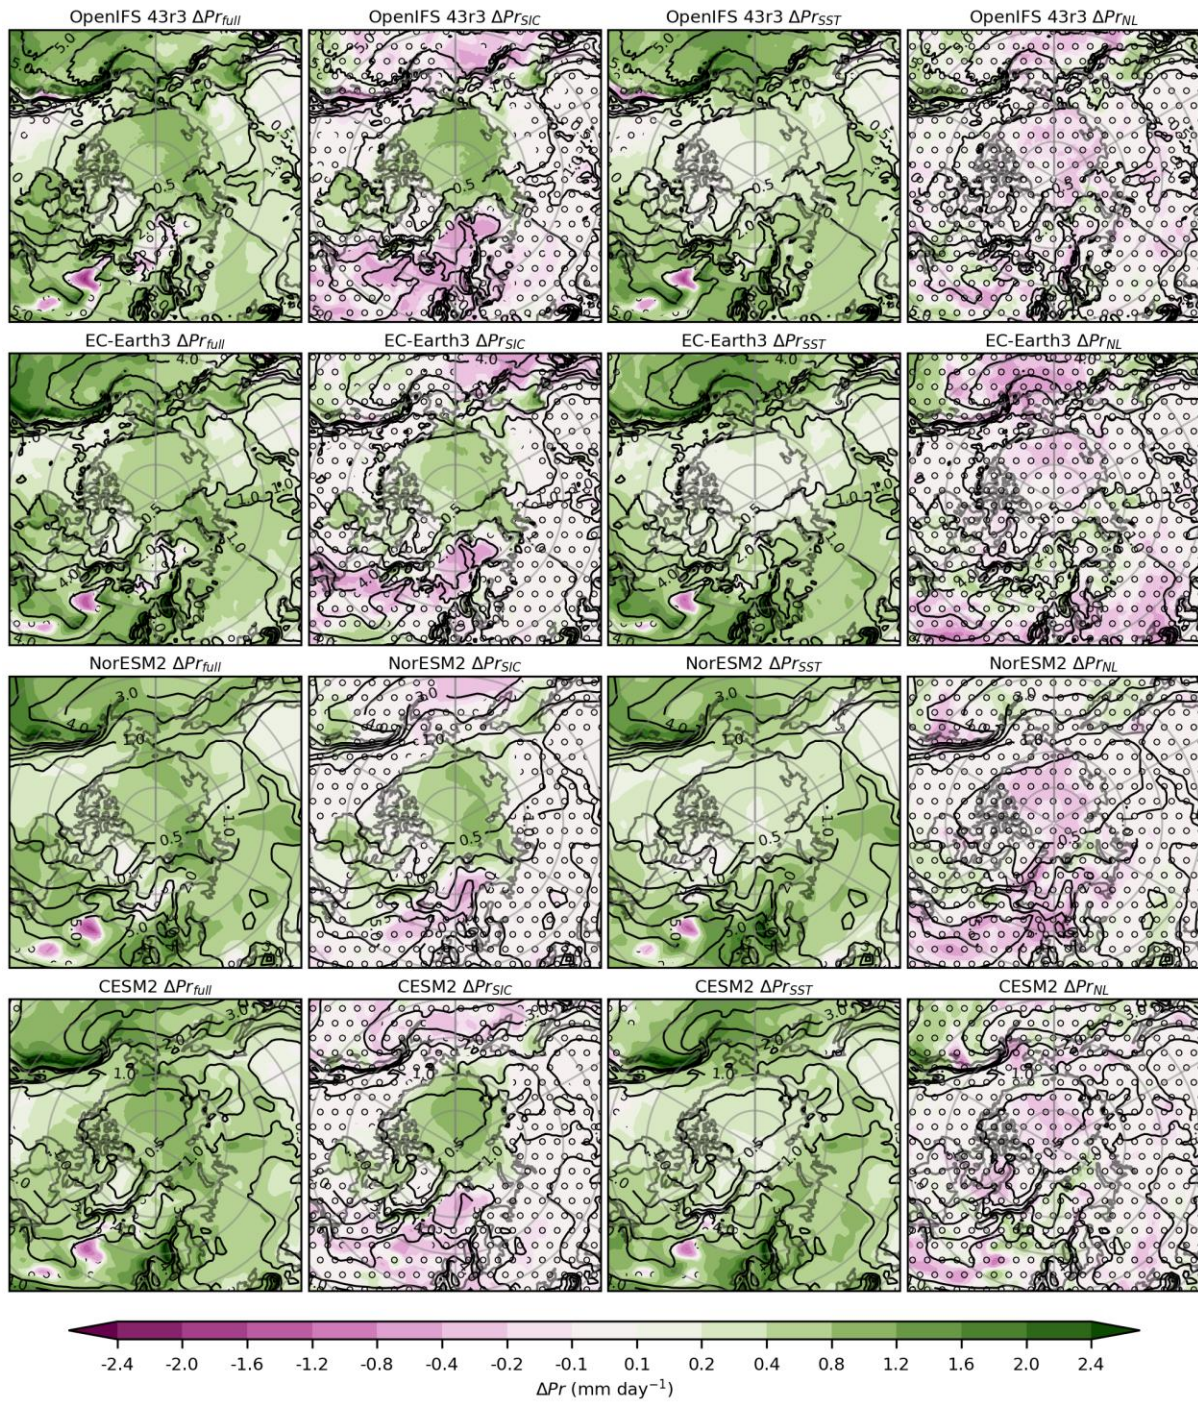

Figure S9. Difference in precipitation ( $Pr$ ) in northern hemisphere winter (DJF) between the SSP585 simulation and Baseline ( $\Delta Pr_{full}$ , left), between SIC\_SSP585 and Baseline ( $\Delta Pr_{SIC}$ , 2nd left), between SST\_SSP585 and Baseline ( $\Delta Pr_{SST}$ , 3rd left) and the nonlinear ( $\Delta Pr_{NL}$  residual) contribution (right). The model in the 1st row is OpenIFS, 2nd row is EC-Earth3, 3rd row is NorESM2 and 4th row is CESM2. Stippling indicates that the changes are not statistically significant based on t-test with p-value 0.05 and contours show the precipitation in Baseline simulation.



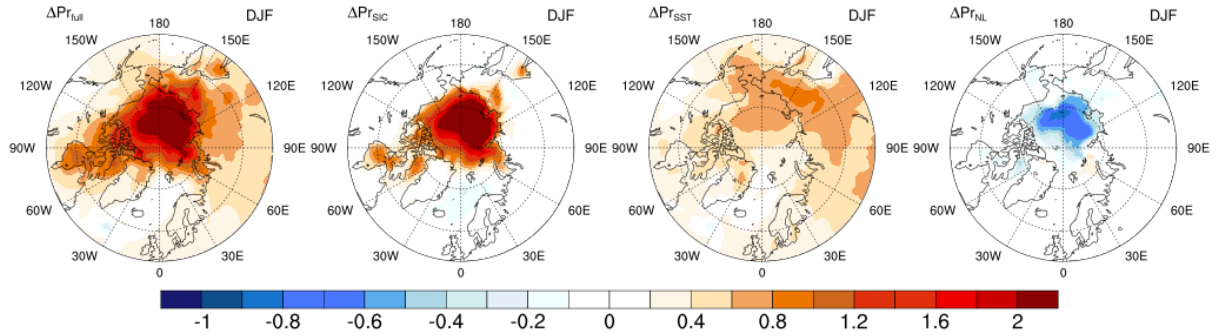

Figure S10. Relative difference in precipitation ( $Pr$ ) in northern hemisphere winter (DJF) between the SSP585 simulation and Baseline ( $\Delta Pr_{full}$ , left), between SIC\_SSP585 and Baseline ( $\Delta Pr_{SIC}$ , 2nd left), between SST\_SSP585 and Baseline ( $\Delta Pr_{SST}$ , 3rd left) and the nonlinear ( $\Delta Pr_{NL}$  residual) contribution (right). The model in the 1st row is OpenIFS, 2nd row is EC-Earth3, 3rd row is NorESM2 and 4th row is CESM2 shows the multi-model mean and the lower row the maximum difference between models. Stippling indicates that the changes are not statistically significant.

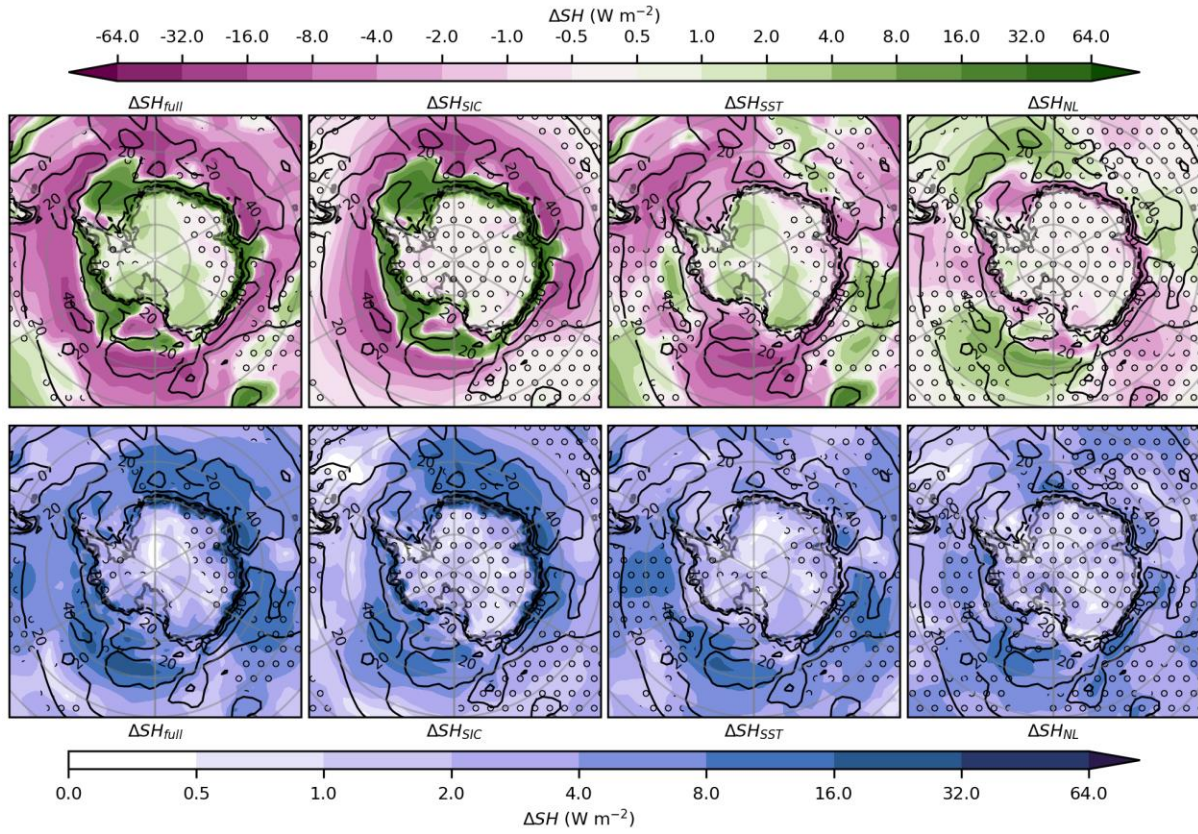

Figure S11. Difference in sensible heat flux (SH) in southern hemisphere winter (JJA) between the SSP585 simulation and Baseline ( $\Delta SH_{\text{full}}$ , left), between SIC\_SSP585 and Baseline ( $\Delta SH_{\text{SIC}}$ , 2nd left), between SST\_SSP585 and Baseline ( $\Delta SH_{\text{SST}}$ , 3rd left) and the nonlinear ( $\Delta SH_{\text{NL}}$  residual) contribution (right). The upper row shows the multi-model mean and the lower row the maximum difference between models. Stippling indicates that all models do not agree on the direction of the change and contours show the sensible heat flux in Baseline simulation.



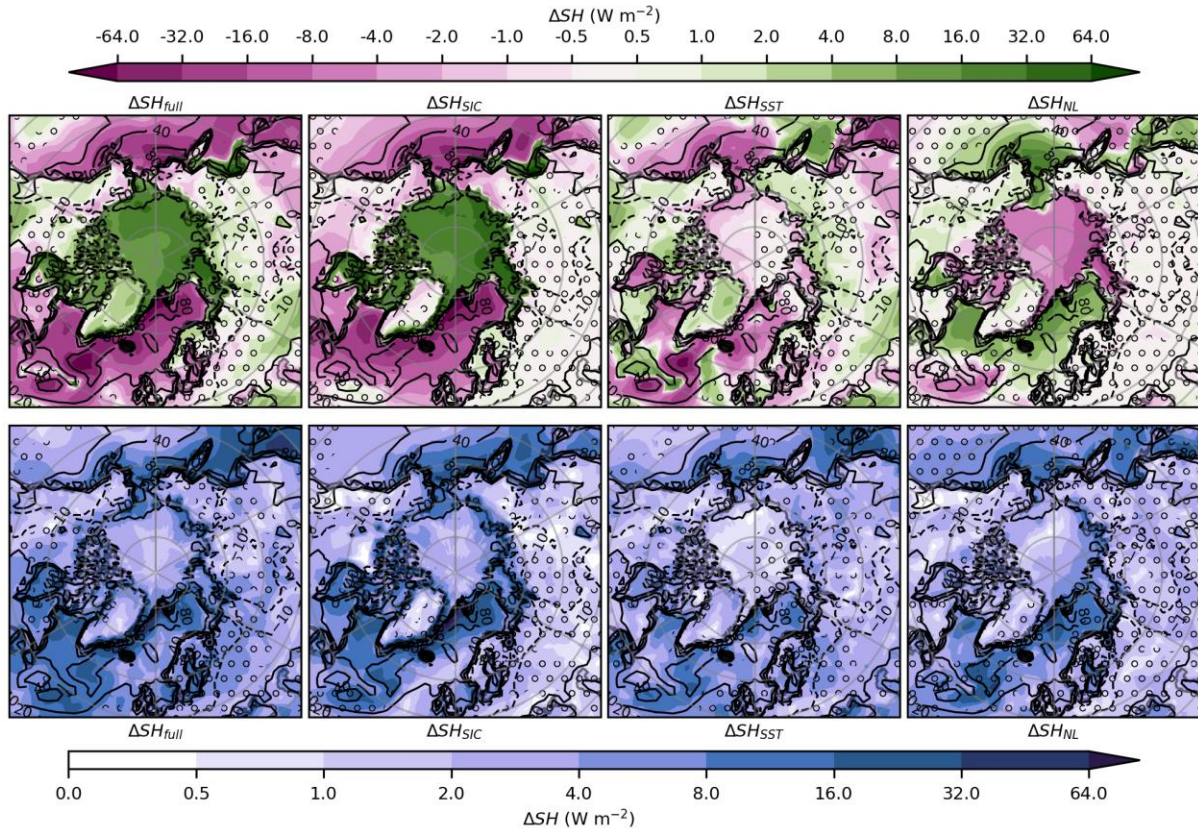

Figure S12. Difference in sensible heat flux (SH) in northern hemisphere winter (DJF) between the SSP585 simulation and Baseline ( $\Delta SH_{full}$ , left), between SIC\_SSP585 and Baseline ( $\Delta SH_{SIC}$ , 2nd left), between SST\_SSP585 and Baseline ( $\Delta SH_{SST}$ , 3rd left) and the nonlinear ( $\Delta SH_{NL}$  residual) contribution (right). The upper row shows the multi-model mean and the lower row the maximum difference between models. Stippling indicates that all models do not agree on the direction of the change and contours show the sensible heat flux in Baseline simulation.

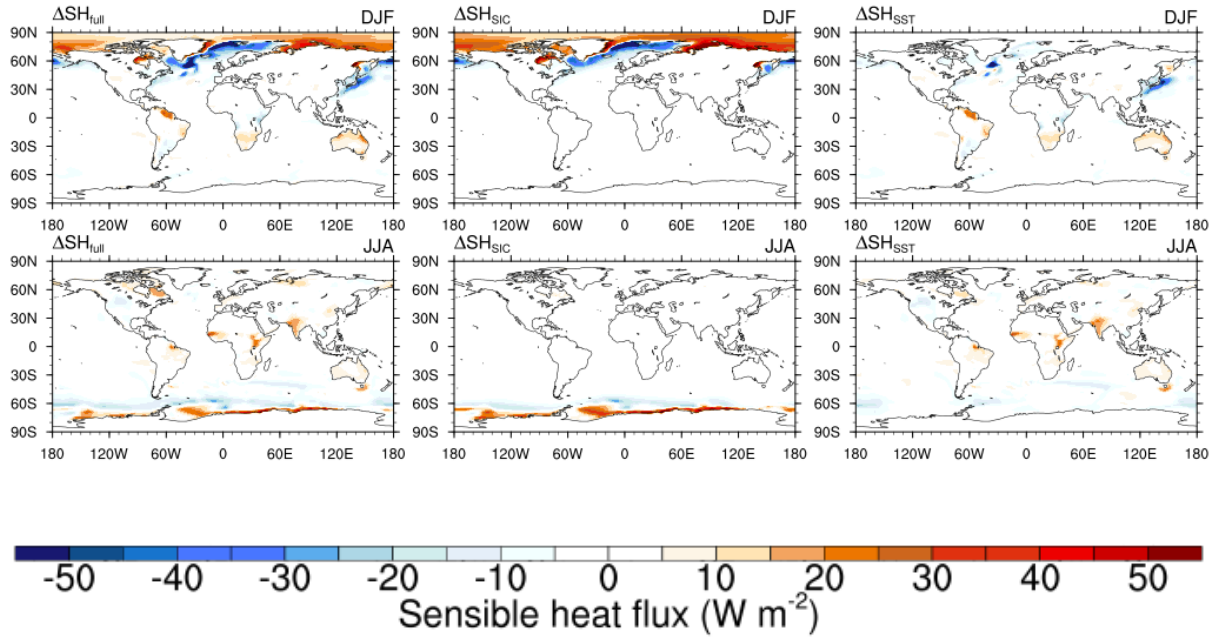

Figure S13. Difference in sensible heat flux (SH) in southern hemisphere winter (JJA, upper row) and in northern hemisphere winter (DJF, lower row) between the SSP585 simulation and Baseline ( $\Delta SH_{full}$ , left), between SIC\_SSP585 and Baseline ( $\Delta SH_{SIC}$ , middle), between SST\_SSP585 and Baseline ( $\Delta SH_{SST}$ , right).



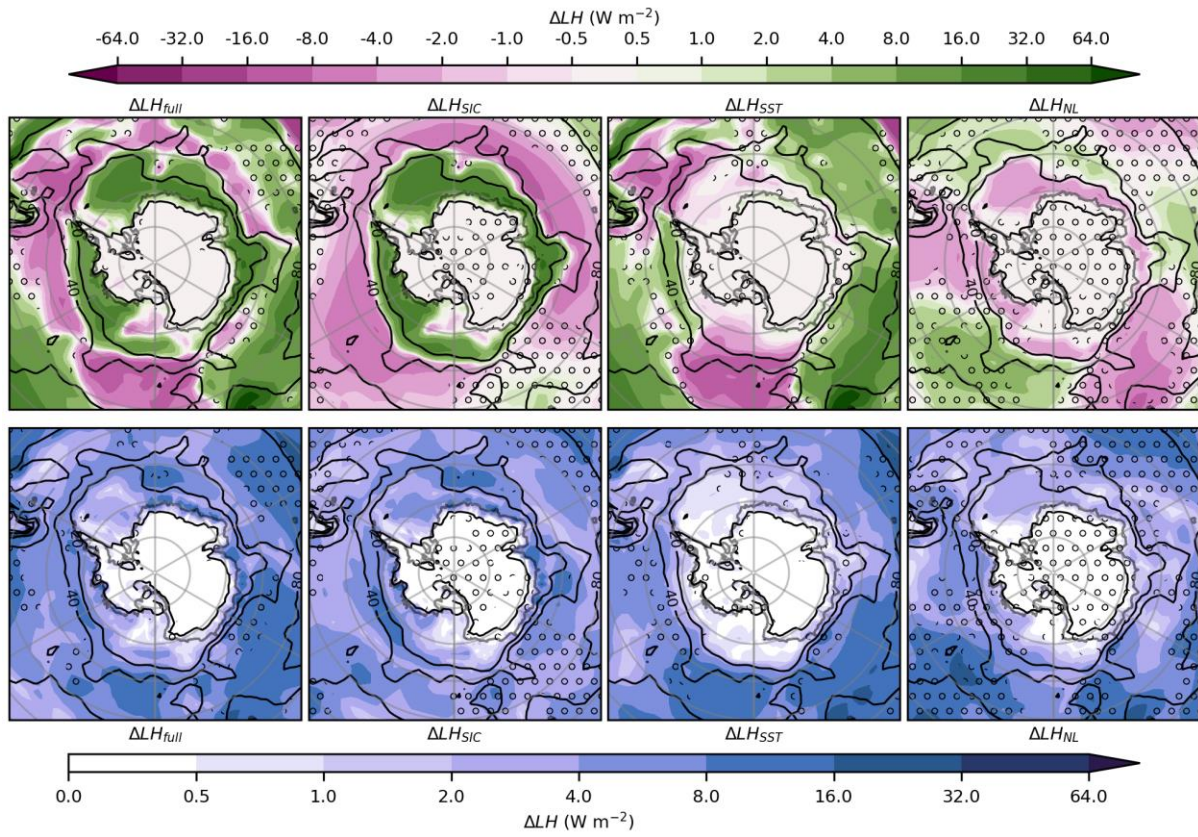

Figure S14. Difference in latent heat flux (LH) in southern hemisphere winter (JJA) between the SSP585 simulation and Baseline ( $\Delta LH_{full}$ , left), between SIC\_SSP585 and Baseline ( $\Delta LH_{SIC}$ , 2nd left), between SST\_SSP585 and Baseline ( $\Delta LH_{SST}$ , 3rd left) and the nonlinear ( $\Delta LH_{NL}$  residual) contribution (right). The upper row shows the multi-model mean and the lower row the maximum difference between models. Stippling indicates that all models do not agree on the direction of the change and contours show the latent heat flux in Baseline simulation.

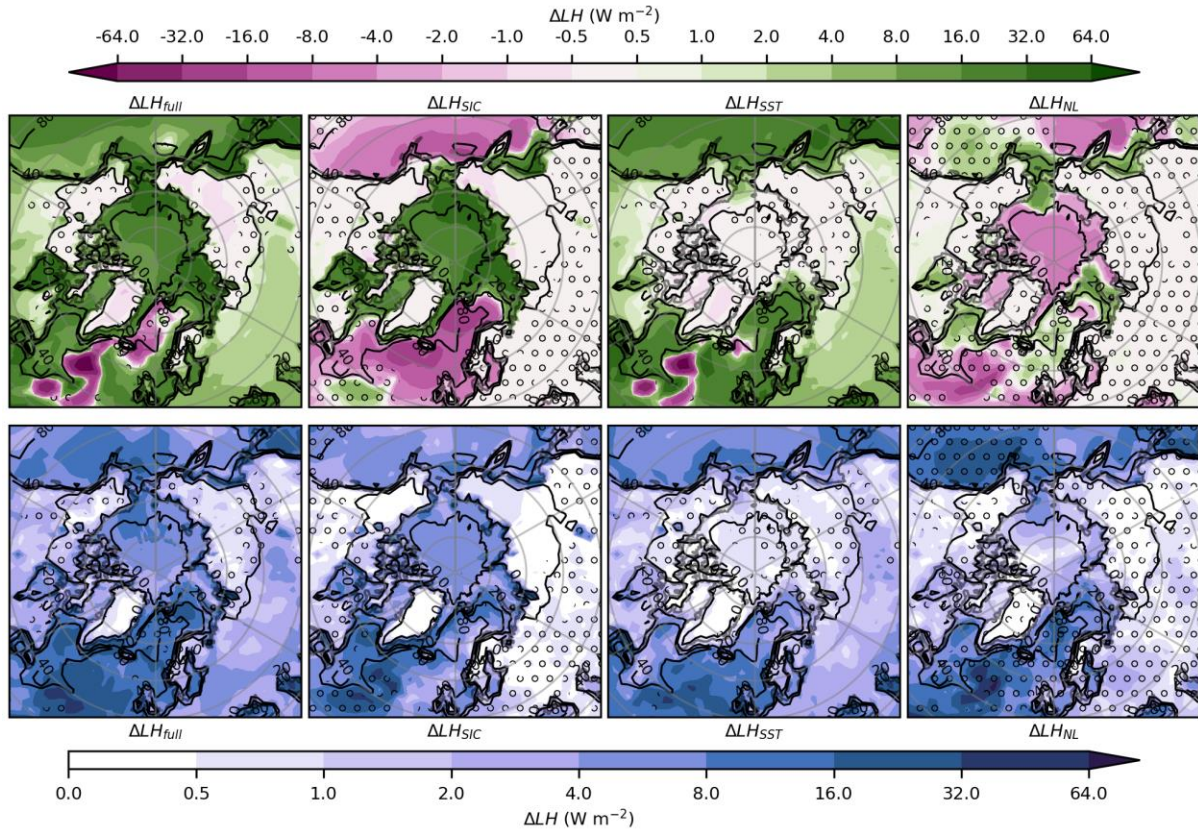

Figure S15. Difference in latent heat flux (LH) in northern hemisphere winter (DJF) between the SSP585 simulation and Baseline ( $\Delta LH_{full}$ , left), between SIC\_SSP585 and Baseline ( $\Delta LH_{SIC}$ , 2nd left), between SST\_SSP585 and Baseline ( $\Delta LH_{SST}$ , 3rd left) and the nonlinear ( $\Delta LH_{NL}$  residual) contribution (right). The upper row shows the multi-model mean and the lower row the maximum difference between models. Stippling indicates that all models do not agree on the direction of the change and contours show the latent heat flux in Baseline simulation.



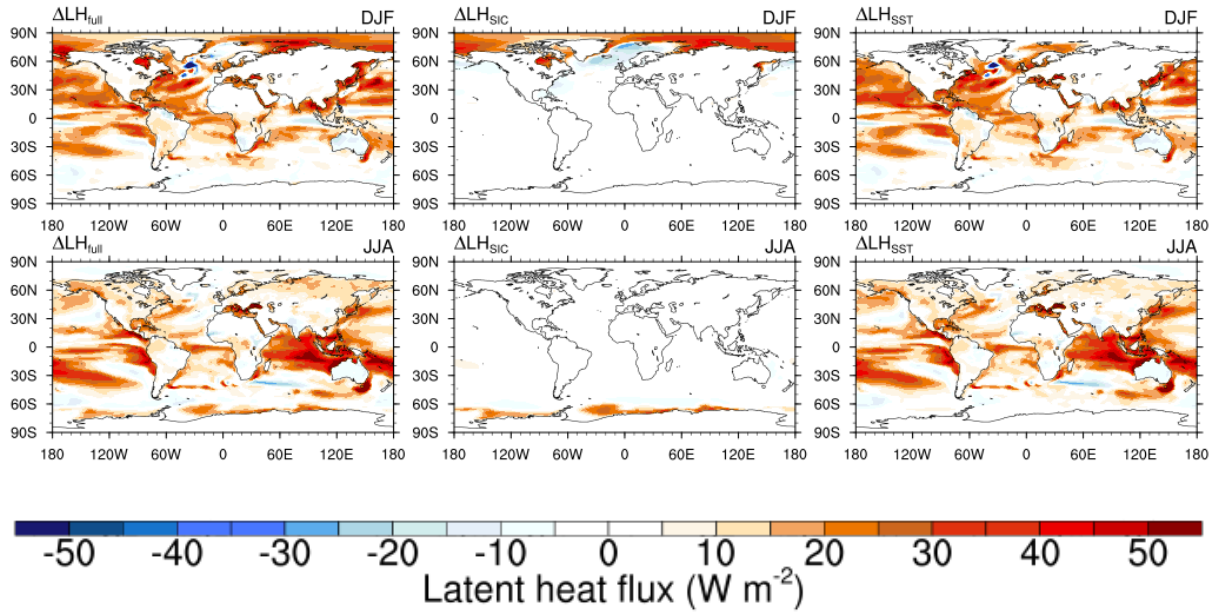

Figure S16. Difference in latent heat flux (LH) in southern hemisphere winter (JJA, upper row) and in northern hemisphere winter (DJF, lower row) between the SSP585 simulation and Baseline ( $\Delta LH_{full}$ , left), between SIC\_SSP585 and Baseline ( $\Delta LH_{SIC}$ , 2nd left), between SST\_SSP585 and Baseline ( $\Delta LH_{SST}$ , 3rd left).

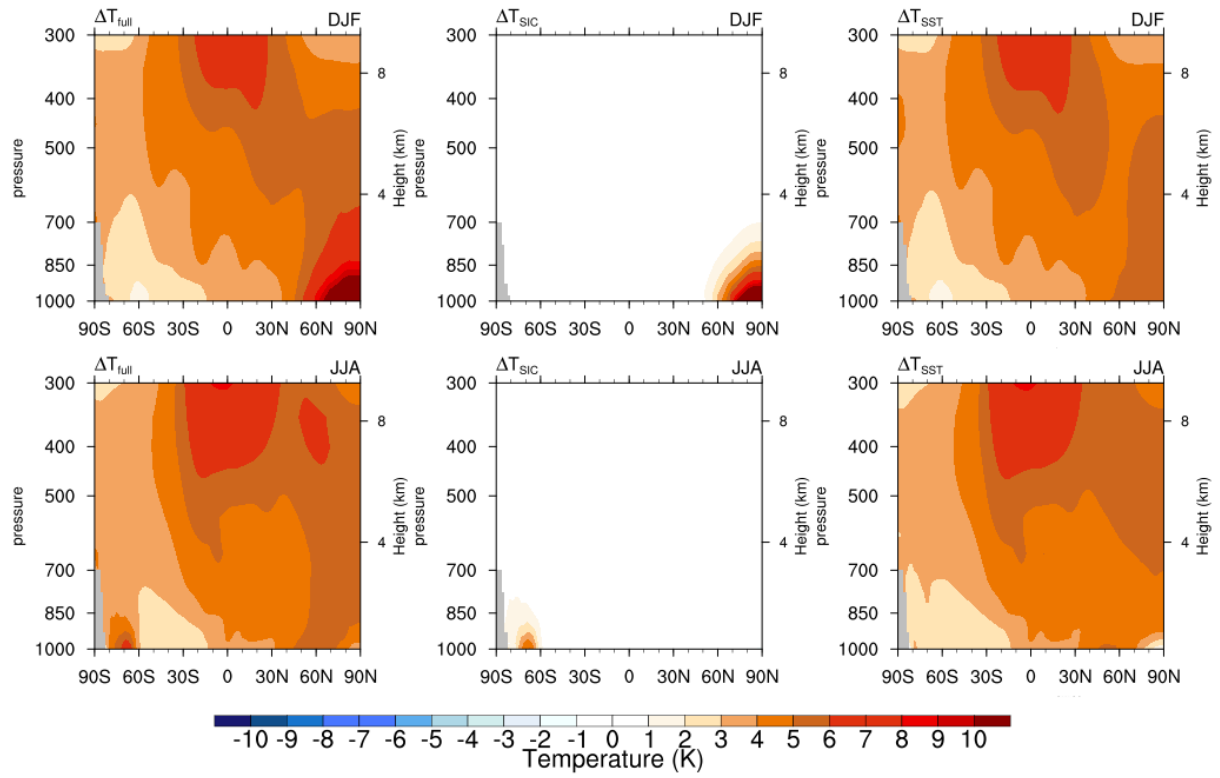

Figure S17. Zonal-mean temperature difference in northern hemisphere winter (DJF, upper row) and in southern hemisphere winter (JJA, lower row) between the SSP585 simulation and Baseline ( $\Delta T_{full}$ , left), between SIC\_SSP585 and Baseline ( $\Delta T_{SIC}$ , middle), between SST\_SSP585 and Baseline ( $\Delta T_{SST}$ , right).



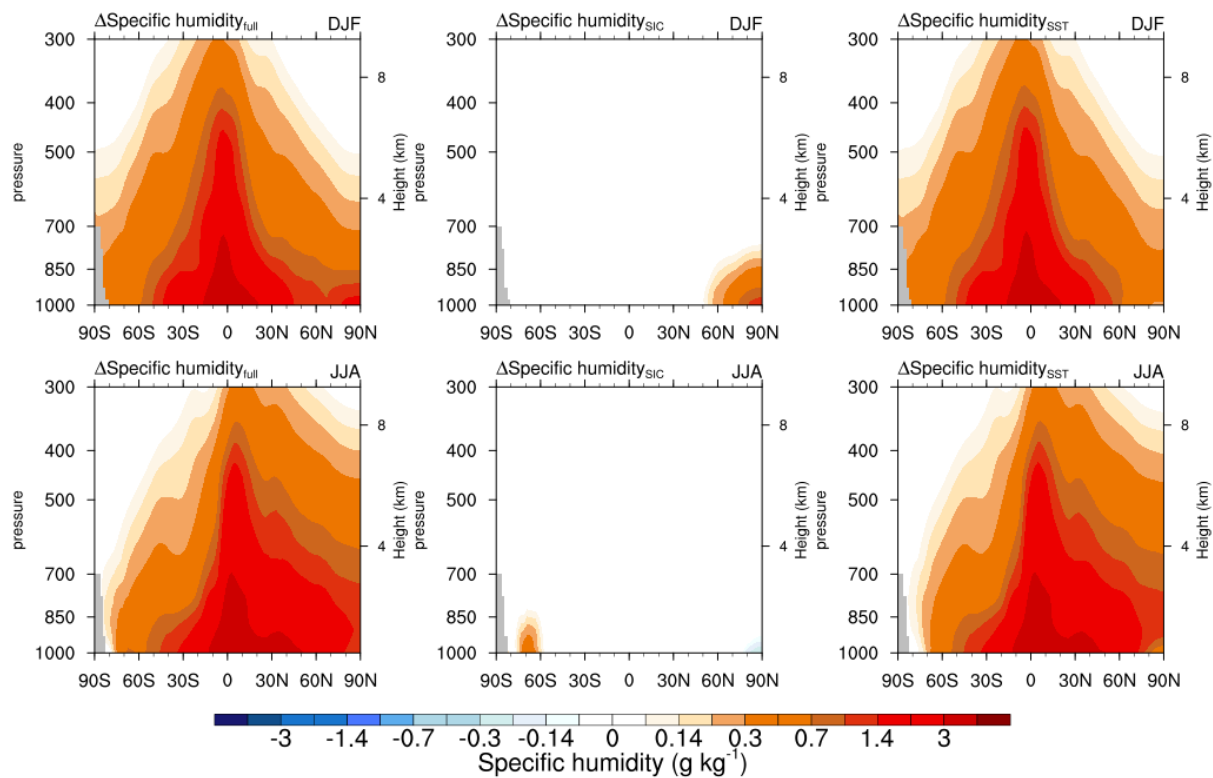

Figure S18. Zonal-mean specific humidity difference ( $\text{g} / \text{kg}$ ) in northern hemisphere winter (DJF, upper row) and in southern hemisphere winter (JJA, lower row) between the SSP585 simulation and Baseline ( $\Delta q_{\text{FULL}}$ , left), between SIC\_SSP585 and Baseline ( $\Delta q_{\text{SIC}}$ , middle), between SST\_SSP585 and Baseline ( $\Delta q_{\text{SST}}$ , right).
